# Supplementary material
Source: ML conference proceedings conference paper supplement (https://proceedings.neurips.cc/paper_files/paper/2022/hash/ae5bf4f35236240c9460e761c60fa53d-Abstract.html)
Supplement: Supplementary file 1 [file ae5bf4f35236240c9460e761c60fa53d-Supplemental-Conference.zip]

Archive with 76 entries (62 files):
- ProtoX_Supplement_Camera_Ready/
- ProtoX_Supplement_Camera_Ready/ProtoX_Supplement.pdf
- ProtoX_Supplement_Camera_Ready/code/
- ProtoX_Supplement_Camera_Ready/code/ProtoX_Atari/
- ProtoX_Supplement_Camera_Ready/code/ProtoX_Atari/.ipynb_checkpoints/
- ProtoX_Supplement_Camera_Ready/code/ProtoX_Atari/.ipynb_checkpoints/ProtoX-SeaQuest-checkpoint.ipynb
- ProtoX_Supplement_Camera_Ready/code/ProtoX_Atari/ProtoX-SeaQuest.ipynb
- ProtoX_Supplement_Camera_Ready/code/ProtoX_Atari/__pycache__/
- ProtoX_Supplement_Camera_Ready/code/ProtoX_Atari/__pycache__/dagger.cpython-37.pyc
- ProtoX_Supplement_Camera_Ready/code/ProtoX_Atari/__pycache__/models.cpython-37.pyc
- ProtoX_Supplement_Camera_Ready/code/ProtoX_Atari/__pycache__/pytorchtools.cpython-37.pyc
- ProtoX_Supplement_Camera_Ready/code/ProtoX_Atari/__pycache__/train_utils.cpython-37.pyc
- ProtoX_Supplement_Camera_Ready/code/ProtoX_Atari/archs.py
- ProtoX_Supplement_Camera_Ready/code/ProtoX_Atari/dagger.py
- ProtoX_Supplement_Camera_Ready/code/ProtoX_Atari/models.py
- ProtoX_Supplement_Camera_Ready/code/ProtoX_Atari/pytorchtools.py
- ProtoX_Supplement_Camera_Ready/code/ProtoX_Atari/train_utils.py
- ProtoX_Supplement_Camera_Ready/code/ProtoX_Atari/visualization.py
- ProtoX_Supplement_Camera_Ready/code/ProtoX_Mario/
- ProtoX_Supplement_Camera_Ready/code/ProtoX_Mario/.ipynb_checkpoints/
- ProtoX_Supplement_Camera_Ready/code/ProtoX_Mario/.ipynb_checkpoints/ProtoX_mario-checkpoint.ipynb
- ProtoX_Supplement_Camera_Ready/code/ProtoX_Mario/ProtoX_mario.ipynb
- ProtoX_Supplement_Camera_Ready/code/ProtoX_Mario/dagger.py
- ProtoX_Supplement_Camera_Ready/code/ProtoX_Mario/models.py
- ProtoX_Supplement_Camera_Ready/code/ProtoX_Mario/pytorchtools.py
- ProtoX_Supplement_Camera_Ready/code/ProtoX_Mario/utils.py
- ProtoX_Supplement_Camera_Ready/code/ProtoX_Mario/visualization.py
- ProtoX_Supplement_Camera_Ready/code/baselines/
- ProtoX_Supplement_Camera_Ready/code/baselines/gaifo/
- ProtoX_Supplement_Camera_Ready/code/baselines/gaifo/dagger.py
- ProtoX_Supplement_Camera_Ready/code/baselines/gaifo/gaifo_mario.py
- ProtoX_Supplement_Camera_Ready/code/baselines/gaifo/gaifo_mario84.py
- ProtoX_Supplement_Camera_Ready/code/baselines/gaifo/gaifo_pong.py
- ProtoX_Supplement_Camera_Ready/code/baselines/gaifo/gaifo_seaquest.py
- ProtoX_Supplement_Camera_Ready/code/baselines/gaifo/ppo.py
- ProtoX_Supplement_Camera_Ready/code/baselines/gaifo/ppo_mario.py
- ProtoX_Supplement_Camera_Ready/code/baselines/gaifo/train_utils.py
- ProtoX_Supplement_Camera_Ready/code/baselines/viper/
- ProtoX_Supplement_Camera_Ready/code/baselines/viper/.ipynb_checkpoints/
- ProtoX_Supplement_Camera_Ready/code/baselines/viper/.ipynb_checkpoints/pong-viper-checkpoint.ipynb
- ProtoX_Supplement_Camera_Ready/code/baselines/viper/__pycache__/
- ProtoX_Supplement_Camera_Ready/code/baselines/viper/__pycache__/dagger.cpython-37.pyc
- ProtoX_Supplement_Camera_Ready/code/baselines/viper/dagger.py
- ProtoX_Supplement_Camera_Ready/code/baselines/viper/pong-viper.ipynb
- ProtoX_Supplement_Camera_Ready/code/baselines/viper/seaquest-viper.ipynb
- ProtoX_Supplement_Camera_Ready/code/baselines/viper/utils/
- ProtoX_Supplement_Camera_Ready/code/baselines/viper/utils/#utils.py#
- ProtoX_Supplement_Camera_Ready/code/baselines/viper/utils/__init__.py
- ProtoX_Supplement_Camera_Ready/code/baselines/viper/utils/__pycache__/
- ProtoX_Supplement_Camera_Ready/code/baselines/viper/utils/__pycache__/__init__.cpython-36.pyc
- ProtoX_Supplement_Camera_Ready/code/baselines/viper/utils/__pycache__/__init__.cpython-37.pyc
- ProtoX_Supplement_Camera_Ready/code/baselines/viper/utils/__pycache__/__init__.cpython-38.pyc
- ProtoX_Supplement_Camera_Ready/code/baselines/viper/utils/__pycache__/callbacks.cpython-36.pyc
- ProtoX_Supplement_Camera_Ready/code/baselines/viper/utils/__pycache__/callbacks.cpython-37.pyc
- ProtoX_Supplement_Camera_Ready/code/baselines/viper/utils/__pycache__/exp_manager.cpython-36.pyc
- ProtoX_Supplement_Camera_Ready/code/baselines/viper/utils/__pycache__/exp_manager.cpython-37.pyc
- ProtoX_Supplement_Camera_Ready/code/baselines/viper/utils/__pycache__/exp_manager.cpython-38.pyc
- ProtoX_Supplement_Camera_Ready/code/baselines/viper/utils/__pycache__/hyperparams_opt.cpython-36.pyc
- ProtoX_Supplement_Camera_Ready/code/baselines/viper/utils/__pycache__/hyperparams_opt.cpython-37.pyc
- ProtoX_Supplement_Camera_Ready/code/baselines/viper/utils/__pycache__/import_envs.cpython-36.pyc
- ProtoX_Supplement_Camera_Ready/code/baselines/viper/utils/__pycache__/import_envs.cpython-37.pyc
- ProtoX_Supplement_Camera_Ready/code/baselines/viper/utils/__pycache__/import_envs.cpython-38.pyc
- ProtoX_Supplement_Camera_Ready/code/baselines/viper/utils/__pycache__/utils.cpython-36.pyc
- ProtoX_Supplement_Camera_Ready/code/baselines/viper/utils/__pycache__/utils.cpython-37.pyc
- ProtoX_Supplement_Camera_Ready/code/baselines/viper/utils/__pycache__/utils.cpython-38.pyc
- ProtoX_Supplement_Camera_Ready/code/baselines/viper/utils/benchmark.py
- ProtoX_Supplement_Camera_Ready/code/baselines/viper/utils/callbacks.py
- ProtoX_Supplement_Camera_Ready/code/baselines/viper/utils/exp_manager.py
- ProtoX_Supplement_Camera_Ready/code/baselines/viper/utils/hyperparams_opt.py
- ProtoX_Supplement_Camera_Ready/code/baselines/viper/utils/import_envs.py
- ProtoX_Supplement_Camera_Ready/code/baselines/viper/utils/record_training.py
- ProtoX_Supplement_Camera_Ready/code/baselines/viper/utils/record_video.py
- ProtoX_Supplement_Camera_Ready/code/baselines/viper/utils/utils.py
- ProtoX_Supplement_Camera_Ready/code/baselines/viper/utils/wrappers.py
- ProtoX_Supplement_Camera_Ready/code/readme.txt
- ProtoX_Supplement_Camera_Ready/code/requirements.txt
