# Supplementary material
Source: ML conference proceedings conference paper supplement (https://proceedings.neurips.cc/paper_files/paper/2022/hash/ae5bf4f35236240c9460e761c60fa53d-Abstract.html)
Supplement: Supplementary file 1 [file ae5bf4f35236240c9460e761c60fa53d-Supplemental-Conference.zip › ProtoX_Supplement_Camera_Ready/code/baselines/viper/utils/__init__.py]

from .utils import (
    ALGOS,
    create_test_env,
    get_latest_run_id,
    get_saved_hyperparams,
    get_trained_models,
    get_wrapper_class,
    linear_schedule,
)
