# Supplementary material
Source: ML conference proceedings conference paper supplement (https://proceedings.neurips.cc/paper_files/paper/2022/hash/ae5bf4f35236240c9460e761c60fa53d-Abstract.html)
Supplement: Supplementary file 1 [file ae5bf4f35236240c9460e761c60fa53d-Supplemental-Conference.zip › ProtoX_Supplement_Camera_Ready/code/baselines/viper/utils/benchmark.py]

import argparse
import json
import os
import shutil
import subprocess

import numpy as np
import pandas as pd
import pytablewriter
from stable_baselines3.common.results_plotter import load_results, ts2xy

from utils.utils import get_latest_run_id, get_saved_hyperparams, get_trained_models

parser = argparse.ArgumentParser()
parser.add_argument("--log-dir", help="Root log folder", default="rl-trained-agents/", type=str)
parser.add_argument("--benchmark-dir", help="Benchmark log folder", default="logs/benchmark/", type=str)
parser.add_argument("-n", "--n-timesteps", help="number of timesteps", default=150000, type=int)
parser.add_argument("--n-envs", help="number of environments", default=1, type=int)
parser.add_argument("--verbose", help="Verbose mode (0: no output, 1: INFO)", default=1, type=int)
parser.add_argument("--seed", help="Random generator seed", type=int, default=0)
parser.add_argument("--test-mode", action="store_true", default=False, help="Do only one experiment (useful for testing)")
parser.add_argument("--num-threads", help="Number of threads for PyTorch", default=2, type=int)
args = parser.parse_args()

trained_models = get_trained_models(args.log_dir)
n_experiments = len(trained_models)
results = {
    "algo": [],
    "env_id": [],
    "mean_reward": [],
    "std_reward": [],
    "n_timesteps": [],
    "eval_timesteps": [],
    "eval_episodes": [],
}

for idx, trained_model in enumerate(trained_models.keys()):  # noqa: C901
    algo, env_id = trained_models[trained_model]
    n_envs = args.n_envs
    n_timesteps = args.n_timesteps
    if algo in ["dqn", "qrdqn", "ddpg", "sac", "td3", "tqc", "her"]:
        n_envs = 1
        n_timesteps *= args.n_envs

    # Comment out to benchmark HER robotics env
    # this requires a mujoco licence
    if "Fetch" in env_id:
        print(f"Skipping mujoco env: {env_id}")
        continue

    reward_log = os.path.join(args.benchmark_dir, trained_model)
    arguments = [
        "-n",
        str(n_timesteps),
        "--n-envs",
        str(n_envs),
        "-f",
        args.log_dir,
        "--algo",
        algo,
        "--env",
        env_id,
        "--no-render",
        "--num-threads",
        str(args.num_threads),
        "--seed",
        str(args.seed),
        "--verbose",
        "0",
        "--reward-log",
        reward_log,
    ]
    if args.verbose >= 1:
        print(f"{idx + 1}/{n_experiments}")
        print(f"Evaluating {algo} on {env_id}...")

    skip_eval = False
    if os.path.isdir(reward_log):
        try:
            x, y = ts2xy(load_results(reward_log), "timesteps")
            skip_eval = len(x) > 0
        except (json.JSONDecodeError, pd.errors.EmptyDataError, TypeError):
            pass

    if skip_eval:
        print("Skipping eval...")
    else:
        return_code = subprocess.call(["python", "enjoy.py"] + arguments)
        if return_code != 0:
            print("Error during evaluation, skipping...")
            continue
        x, y = ts2xy(load_results(reward_log), "timesteps")

    if len(x) > 0:
        # Retrieve training timesteps from config
        exp_id = get_latest_run_id(os.path.join(args.log_dir, algo), env_id)
        log_path = os.path.join(args.log_dir, algo, f"{env_id}_{exp_id}", env_id)
        hyperparams, _ = get_saved_hyperparams(log_path)
        # Hack to format it properly
        if hyperparams["n_timesteps"] < 1e6:
            n_training_timesteps = f"{int(hyperparams['n_timesteps'] / 1e3)}k"
        else:
            n_training_timesteps = f"{int(hyperparams['n_timesteps'] / 1e6)}M"

        mean_reward = np.mean(y)
        std_reward = np.std(y)
        results["algo"].append(algo)
        results["env_id"].append(env_id)
        results["mean_reward"].append(mean_reward)
        results["std_reward"].append(std_reward)
        results["n_timesteps"].append(n_training_timesteps)
        results["eval_timesteps"].append(x[-1])
        results["eval_episodes"].append(len(y))
        if args.verbose >= 1:
            print(x[-1], "timesteps")
            print(len(y), "Episodes")
            print(f"Mean reward: {mean_reward:.2f} +- {std_reward:.2f}")
            print()
    else:
        print("Not enough timesteps")

    if args.test_mode:
        break

# Create DataFrame
results_df = pd.DataFrame(results)
# Sort results
results_df = results_df.sort_values(by=["algo", "env_id"])

writer = pytablewriter.MarkdownTableWriter()
writer.from_dataframe(results_df)

header = """
## Performance of trained agents

Final performance of the trained agents can be found in the table below.
This was computed by running `python -m utils.benchmark`:
it runs the trained agent (trained on `n_timesteps`) for `eval_timesteps` and then reports the mean episode reward
during this evaluation.

It uses the deterministic policy except for Atari games.

*NOTE: this is not a quantitative benchmark as it corresponds to only one run
(cf [issue #38](https://github.com/araffin/rl-baselines-zoo/issues/38)).
This benchmark is meant to check algorithm (maximal) performance, find potential bugs
and also allow users to have access to pretrained agents.*

"M" stands for Million (1e6)

"""

# change the output stream to a file
tmp_path = os.path.join(args.benchmark_dir, "benchmark.md")
with open(tmp_path, "w") as f:
    f.write(header)
    writer.stream = f
    writer.write_table()
print(f"Results written to: {tmp_path}")

# Update root benchmark file
if not args.test_mode:
    shutil.copy(tmp_path, "benchmark.md")
    print("Results copied to: benchmark.md")

# Alternatively, to dump as csv file:
# results_df.to_csv(f"{args.benchmark_dir}/benchmark.csv",sep=",", index=False)
# print("Saved results to {args.benchmark_dir}/benchmark.csv")
