# Supplementary material
Source: ML conference proceedings conference paper supplement (https://proceedings.neurips.cc/paper_files/paper/2022/hash/ae5bf4f35236240c9460e761c60fa53d-Abstract.html)
Supplement: Supplementary file 1 [file ae5bf4f35236240c9460e761c60fa53d-Supplemental-Conference.zip › ProtoX_Supplement_Camera_Ready/code/baselines/viper/utils/callbacks.py]

import os
import tempfile
import time
from copy import deepcopy
from threading import Thread
from typing import Optional

import optuna
from sb3_contrib import TQC
from stable_baselines3 import SAC
from stable_baselines3.common.callbacks import BaseCallback, EvalCallback
from stable_baselines3.common.vec_env import VecEnv


class TrialEvalCallback(EvalCallback):
    """
    Callback used for evaluating and reporting a trial.
    """

    def __init__(
        self,
        eval_env: VecEnv,
        trial: optuna.Trial,
        n_eval_episodes: int = 5,
        eval_freq: int = 10000,
        deterministic: bool = True,
        verbose: int = 0,
    ):

        super(TrialEvalCallback, self).__init__(
            eval_env=eval_env,
            n_eval_episodes=n_eval_episodes,
            eval_freq=eval_freq,
            deterministic=deterministic,
            verbose=verbose,
        )
        self.trial = trial
        self.eval_idx = 0
        self.is_pruned = False

    def _on_step(self) -> bool:
        if self.eval_freq > 0 and self.n_calls % self.eval_freq == 0:
            super(TrialEvalCallback, self)._on_step()
            self.eval_idx += 1
            # report best or report current ?
            # report num_timesteps or elasped time ?
            self.trial.report(self.last_mean_reward, self.eval_idx)
            # Prune trial if need
            if self.trial.should_prune():
                self.is_pruned = True
                return False
        return True


class SaveVecNormalizeCallback(BaseCallback):
    """
    Callback for saving a VecNormalize wrapper every ``save_freq`` steps

    :param save_freq: (int)
    :param save_path: (str) Path to the folder where ``VecNormalize`` will be saved, as ``vecnormalize.pkl``
    :param name_prefix: (str) Common prefix to the saved ``VecNormalize``, if None (default)
        only one file will be kept.
    """

    def __init__(self, save_freq: int, save_path: str, name_prefix: Optional[str] = None, verbose: int = 0):
        super(SaveVecNormalizeCallback, self).__init__(verbose)
        self.save_freq = save_freq
        self.save_path = save_path
        self.name_prefix = name_prefix

    def _init_callback(self) -> None:
        # Create folder if needed
        if self.save_path is not None:
            os.makedirs(self.save_path, exist_ok=True)

    def _on_step(self) -> bool:
        if self.n_calls % self.save_freq == 0:
            if self.name_prefix is not None:
                path = os.path.join(self.save_path, f"{self.name_prefix}_{self.num_timesteps}_steps.pkl")
            else:
                path = os.path.join(self.save_path, "vecnormalize.pkl")
            if self.model.get_vec_normalize_env() is not None:
                self.model.get_vec_normalize_env().save(path)
                if self.verbose > 1:
                    print(f"Saving VecNormalize to {path}")
        return True


class ParallelTrainCallback(BaseCallback):
    """
    Callback to explore (collect experience) and train (do gradient steps)
    at the same time using two separate threads.
    Normally used with off-policy algorithms and `train_freq=(1, "episode")`.

    TODO:
    - blocking mode: wait for the model to finish updating the policy before collecting new experience
        at the end of a rollout
    - force sync mode: stop training to update to the latest policy for collecting
        new experience

    :param gradient_steps: Number of gradient steps to do before
        sending the new policy
    :param verbose: Verbosity level
    :param sleep_time: Limit the fps in the thread collecting experience.
    """

    def __init__(self, gradient_steps: int = 100, verbose: int = 0, sleep_time: float = 0.0):
        super(ParallelTrainCallback, self).__init__(verbose)
        self.batch_size = 0
        self._model_ready = True
        self._model = None
        self.gradient_steps = gradient_steps
        self.process = None
        self.model_class = None
        self.sleep_time = sleep_time

    def _init_callback(self) -> None:
        temp_file = tempfile.TemporaryFile()
        self.model.save(temp_file)
        # TODO: add support for other algorithms
        for model_class in [SAC, TQC]:
            if isinstance(self.model, model_class):
                self.model_class = model_class
                break

        assert self.model_class is not None, f"{self.model} is not supported for parallel training"
        self._model = self.model_class.load(temp_file)

        self.batch_size = self._model.batch_size
        # TODO: update SB3 and check train freq instead
        # of gradient_steps > 0
        self.model.gradient_steps = 1
        self.model.tau = 0.0
        self.model.learning_rate = 0.0
        self.model.batch_size = 1

    def train(self) -> None:
        self._model_ready = False
        self.process = Thread(target=self._train_thread, daemon=True)
        self.process.start()

    def _train_thread(self) -> None:
        self._model.train(gradient_steps=self.gradient_steps, batch_size=self.batch_size)
        self._model_ready = True
        self.logger.record("train/n_updates_real", self._model._n_updates, exclude="tensorboard")

    def _on_step(self) -> bool:
        if self.sleep_time > 0:
            time.sleep(self.sleep_time)
        return True

    def _on_rollout_end(self) -> None:
        if self._model_ready:
            self._model.replay_buffer = deepcopy(self.model.replay_buffer)
            self.model.set_parameters(deepcopy(self._model.get_parameters()))
            self.model.actor = self.model.policy.actor
            if self.num_timesteps >= self._model.learning_starts:
                self.train()
            # Do not wait for the training loop to finish
            # self.process.join()

    def _on_training_end(self) -> None:
        # Wait for the thread to terminate
        if self.process is not None:
            if self.verbose > 0:
                print("Waiting for training thread to terminate")
            self.process.join()
