# Supplementary material
Source: ML conference proceedings conference paper supplement (https://proceedings.neurips.cc/paper_files/paper/2022/hash/ae5bf4f35236240c9460e761c60fa53d-Abstract.html)
Supplement: Supplementary file 1 [file ae5bf4f35236240c9460e761c60fa53d-Supplemental-Conference.zip › ProtoX_Supplement_Camera_Ready/code/baselines/viper/utils/import_envs.py]

try:
    import pybullet_envs  # pytype: disable=import-error
except ImportError:
    pybullet_envs = None

try:
    import highway_env  # pytype: disable=import-error
except ImportError:
    highway_env = None

try:
    import neck_rl  # pytype: disable=import-error
except ImportError:
    neck_rl = None

try:
    import mocca_envs  # pytype: disable=import-error
except ImportError:
    mocca_envs = None

try:
    import custom_envs  # pytype: disable=import-error
except ImportError:
    custom_envs = None

try:
    import gym_donkeycar  # pytype: disable=import-error
except ImportError:
    gym_donkeycar = None
