# Supplementary material
Source: ML conference proceedings conference paper supplement (https://proceedings.neurips.cc/paper_files/paper/2022/hash/ae5bf4f35236240c9460e761c60fa53d-Abstract.html)
Supplement: Supplementary file 1 [file ae5bf4f35236240c9460e761c60fa53d-Supplemental-Conference.zip › ProtoX_Supplement_Camera_Ready/code/ProtoX_Atari/dagger.py]

import argparse
import importlib
import os
import sys

import numpy as np
import torch as th
import yaml
from stable_baselines3.common.utils import set_random_seed

import pickle

import utils.import_envs  # noqa: F401 pylint: disable=unused-import
from utils import ALGOS, create_test_env, get_latest_run_id, get_saved_hyperparams
from utils.exp_manager import ExperimentManager
from utils.utils import StoreDict


def get_env_and_model(env='EnduroNoFrameskip-v4',
                      folder='rl-trained-agents',
                      algo='ppo',
                      n_timesteps=1000,
                      num_threads=-1,
                      n_envs = 1,
                      exp_id=0,
                      verbose=1,
                      no_render=True,
                      deterministic=False,
                      load_best=False,
                      stochastic=False,
                      norm_reward=False,
                      seed=0,
                      reward_log="",
                      gym_packages=[],
                      load_checkpoint=None):  # noqa: C901
    '''
    parser = argparse.ArgumentParser()
    parser.add_argument("--env", help="environment ID", type=str, default="EnduroNoFrameskip-v4")
    parser.add_argument("-f", "--folder", help="Log folder", type=str, default="rl-trained-agents")
    parser.add_argument("--algo", help="RL Algorithm", default="ppo", type=str, required=False, choices=list(ALGOS.keys()))
    parser.add_argument("-n", "--n-timesteps", help="number of timesteps", default=1000, type=int)
    parser.add_argument("--num-threads", help="Number of threads for PyTorch (-1 to use default)", default=-1, type=int)
    parser.add_argument("--n-envs", help="number of environments", default=1, type=int)
    parser.add_argument("--exp-id", help="Experiment ID (default: 0: latest, -1: no exp folder)", default=0, type=int)
    parser.add_argument("--verbose", help="Verbose mode (0: no output, 1: INFO)", default=1, type=int)
    parser.add_argument(
        "--no-render", action="store_true", default=False, help="Do not render the environment (useful for tests)"
    )
    parser.add_argument("--deterministic", action="store_true", default=False, help="Use deterministic actions")
    parser.add_argument(
        "--load-best", action="store_true", default=False, help="Load best model instead of last model if available"
    )
    parser.add_argument(
        "--load-checkpoint",
        type=int,
        help="Load checkpoint instead of last model if available, "
        "you must pass the number of timesteps corresponding to it",
    )
    parser.add_argument("--stochastic", action="store_true", default=False, help="Use stochastic actions")
    parser.add_argument(
        "--norm-reward", action="store_true", default=False, help="Normalize reward if applicable (trained with VecNormalize)"
    )
    parser.add_argument("--seed", help="Random generator seed", type=int, default=0)
    parser.add_argument("--reward-log", help="Where to log reward", default="", type=str)
    parser.add_argument(
        "--gym-packages",
        type=str,
        nargs="+",
        default=[],
        help="Additional external Gym environment package modules to import (e.g. gym_minigrid)",
    )
    parser.add_argument(
        "--env-kwargs", type=str, nargs="+", action=StoreDict, help="Optional keyword argument to pass to the env constructor"
    )
    args = parser.parse_args()
    '''
    
    # Going through custom gym packages to let them register in the global registory
    for env_module in gym_packages:
        importlib.import_module(env_module)

    env_id = env
    algo = algo
    folder = folder

    if exp_id == 0:
        exp_id = get_latest_run_id(os.path.join(folder, algo), env_id)
        print(f"Loading latest experiment, id={exp_id}")

    # Sanity checks
    if exp_id > 0:
        log_path = os.path.join(folder, algo, f"{env_id}_{exp_id}")
    else:
        log_path = os.path.join(folder, algo)

    print('filter: ', folder)
    print('algo: ', algo)
    print('env_id: ', env_id)
    print('exp id: ', exp_id)
    print('log path: ', log_path)
        
    assert os.path.isdir(log_path), f"The {log_path} folder was not found"

    found = False
    for ext in ["zip"]:
        model_path = os.path.join(log_path, f"{env_id}.{ext}")
        found = os.path.isfile(model_path)
        if found:
            break

    if load_best:
        model_path = os.path.join(log_path, "best_model.zip")
        found = os.path.isfile(model_path)

    if load_checkpoint is not None:
        model_path = os.path.join(log_path, f"rl_model_{load_checkpoint}_steps.zip")
        found = os.path.isfile(model_path)

    if not found:
        raise ValueError(f"No model found for {algo} on {env_id}, path: {model_path}")

    off_policy_algos = ["qrdqn", "dqn", "ddpg", "sac", "her", "td3", "tqc"]

    if algo in off_policy_algos:
        n_envs = 1

    set_random_seed(seed)

    if num_threads > 0:
        if verbose > 1:
            print(f"Setting torch.num_threads to {num_threads}")
        th.set_num_threads(num_threads)

    is_atari = ExperimentManager.is_atari(env_id)

    stats_path = os.path.join(log_path, env_id)
    hyperparams, stats_path = get_saved_hyperparams(stats_path, norm_reward=norm_reward, test_mode=True)

    print('hyperparams: ' , hyperparams)
    
    # load env_kwargs if existing
    env_kwargs = {}
    args_path = os.path.join(log_path, env_id, "yml")
    if os.path.isfile(args_path):
        with open(args_path, "r") as f:
            loaded_args = yaml.load(f, Loader=yaml.UnsafeLoader)  # pytype: disable=module-attr
            if loaded_args["env_kwargs"] is not None:
                env_kwargs = loaded_args["env_kwargs"]
    # overwrite with command line arguments
    if env_kwargs is not None:
        env_kwargs.update(env_kwargs)

    print('env kwargs: ', env_kwargs)

    log_dir = reward_log if reward_log != "" else None

    env = create_test_env(
        env_id,
        n_envs=n_envs,
        stats_path=stats_path,
        seed=seed,
        log_dir=log_dir,
        should_render=not no_render,
        hyperparams=hyperparams,
        env_kwargs=env_kwargs,
    )

    kwargs = dict(seed=seed)
    if algo in off_policy_algos:
        # Dummy buffer size as we don't need memory to enjoy the trained agent
        kwupdate(dict(buffer_size=1))

    # Check if we are running python 3.8+
    # we need to patch saved model under python 3.6/3.7 to load them
    newer_python_version = sys.version_info.major == 3 and sys.version_info.minor >= 8

    custom_objects = {}
    if newer_python_version:
        custom_objects = {
            "learning_rate": 0.0,
            "lr_schedule": lambda _: 0.0,
            "clip_range": lambda _: 0.0,
        }

    model = ALGOS[algo].load(model_path, env=env, custom_objects=custom_objects, **kwargs)

    obs = env.reset()
    print('initial obs shape: ', obs.shape)
    # Deterministic by default except for atari games
    stochastic = stochastic or is_atari and not deterministic
    deterministic = not stochastic

    state = None
    episode_reward = 0.0
    episode_rewards, episode_lengths = [], []
    ep_len = 0
    # For HER, monitor success rate
    successes = []

    acts = {}

    '''
    try:
        for _ in range(n_timesteps):
            action, state = model.predict(obs, state=state, deterministic=deterministic)
            print('action: ', action)
            print('obs shape: ', obs.shape)
            print('state shape: ', state.shape)
            if action[0] not in acts:
                acts[action[0]] = [obs]
            else:
                acts[action[0]].append(obs)
            
            obs, reward, done, infos = env.step(action)
            if not no_render:
                env.render("human")

            episode_reward += reward[0]
            ep_len += 1

            if n_envs == 1:
                # For atari the return reward is not the atari score
                # so we have to get it from the infos dict
                if is_atari and infos is not None and verbose >= 1:
                    episode_infos = infos[0].get("episode")
                    if episode_infos is not None:
                        print(f"Atari Episode Score: {episode_infos['r']:.2f}")
                        print("Atari Episode Length", episode_infos["l"])

                if done and not is_atari and verbose > 0:
                    # NOTE: for env using VecNormalize, the mean reward
                    # is a normalized reward when `--norm_reward` flag is passed
                    print(f"Episode Reward: {episode_reward:.2f}")
                    print("Episode Length", ep_len)
                    episode_rewards.append(episode_reward)
                    episode_lengths.append(ep_len)
                    episode_reward = 0.0
                    ep_len = 0
                    state = None

                # Reset also when the goal is achieved when using HER
                if done and infos[0].get("is_success") is not None:
                    if verbose > 1:
                        print("Success?", infos[0].get("is_success", False))

                    if infos[0].get("is_success") is not None:
                        successes.append(infos[0].get("is_success", False))
                        episode_reward, ep_len = 0.0, 0

    except KeyboardInterrupt:
        pass

    if verbose > 0 and len(successes) > 0:
        print(f"Success rate: {100 * np.mean(successes):.2f}%")

    if verbose > 0 and len(episode_rewards) > 0:
        print(f"{len(episode_rewards)} Episodes")
        print(f"Mean reward: {np.mean(episode_rewards):.2f} +/- {np.std(episode_rewards):.2f}")

    if verbose > 0 and len(episode_lengths) > 0:
        print(f"Mean episode length: {np.mean(episode_lengths):.2f} +/- {np.std(episode_lengths):.2f}")

    env.close()

    pickle.dump(acts, open("acts.p", "wb"))
    '''
    return env, model
