# Supplementary material
Source: ML conference proceedings conference paper supplement (https://proceedings.neurips.cc/paper_files/paper/2022/hash/ae5bf4f35236240c9460e761c60fa53d-Abstract.html)
Supplement: Supplementary file 1 [file ae5bf4f35236240c9460e761c60fa53d-Supplemental-Conference.zip › ProtoX_Supplement_Camera_Ready/code/readme.txt]

To run the code, you should 
1) create python 3.7 virtual environment
2) pip install -r requirements.txt
3) obtain trained agents: https://github.com/DLR-RM/rl-trained-agents and https://github.com/uvipen/Super-mario-bros-PPO-pytorch
4) obtain atari ROMS: https://github.com/openai/atari-py
5) ProtoX, ResNet-BC, and VIPER have associated jupyter notebooks; GAIfO is to be run on the command line

To run ProtoX or ResNet-BC on mario games, use files in ProtoX_Mario folder
To run ProtoX or ResNet-BC on atari games, use files in ProtoX_Atari folder

VIPER and GAIFO files are in the baselines folder

Training data and model checkpoints were not included as they would exceed the 100MB limit
