# Supplementary material
Source: ML conference proceedings conference paper supplement (https://proceedings.neurips.cc/paper_files/paper/2022/hash/ae5bf4f35236240c9460e761c60fa53d-Abstract.html)
Supplement: Supplementary file 1 [file ae5bf4f35236240c9460e761c60fa53d-Supplemental-Conference.zip › ProtoX_Supplement_Camera_Ready/code/requirements.txt]

absl-py==0.13.0
alabaster==0.7.12
alembic==1.6.5
appdirs==1.4.4
argon2-cffi==20.1.0
astor==0.8.1
astunparse==1.6.3
async-generator==1.10
atari-py==0.2.9
attrs==21.2.0
Babel==2.9.1
backcall==0.2.0
black==21.7b0
bleach==3.3.1
box2d-py==2.3.8
cached-property==1.5.2
cachetools==4.2.2
certifi==2021.5.30
certipy==0.1.3
cffi==1.14.6
chardet==4.0.0
charset-normalizer==2.0.4
clang==5.0
click==8.0.1
cliff==3.8.0
cloudpickle==1.6.0
cmaes==0.8.2
cmd2==2.1.2
colabgymrender==1.0.9
colorama==0.4.4
colorlog==5.0.1
configparser==5.0.2
coverage==5.5
cpprb==10.6.4
cryptography==3.4.8
cycler==0.10.0
Cython==0.29.28
DataProperty==0.52.0
debugpy==1.4.1
decorator==4.4.2
defusedxml==0.7.1
docker-pycreds==0.4.0
docutils==0.16
EasyProcess==0.3
einops==0.3.0
entrypoints==0.3
execnet==1.9.0
fasteners==0.17.3
ffmpeg==1.4
flake8==3.9.2
flake8-bugbear==21.4.3
flatbuffers==1.12
future==0.18.2
gast==0.2.2
gitdb==4.0.7
GitPython==3.1.18
glfw==2.5.3
google-auth==1.34.0
google-auth-oauthlib==0.4.5
google-pasta==0.2.0
graphql-core==3.1.5
greenlet==1.1.0
grpcio==1.39.0
gym==0.18.3
gym-minigrid==1.0.2
gym-super-mario-bros==7.3.2
h5py==2.10.0
idna==3.2
ijson==3.1.4
imageio==2.9.0
imageio-ffmpeg==0.4.4
imagesize==1.2.0
importlab==0.6.1
importlib-metadata==4.7.1
iniconfig==1.1.1
ipykernel==6.0.3
ipython==7.26.0
ipython-genutils==0.2.0
ipywidgets==7.6.3
isort==5.9.3
jedi==0.18.0
Jinja2==3.0.1
joblib==1.0.1
jsonschema==3.2.0
jupyter-client==6.1.12
jupyter-core==4.7.1
jupyter-telemetry==0.1.0
jupyterhub==1.4.2
jupyterlab-pygments==0.1.2
jupyterlab-widgets==1.0.0
Keras==2.2.5
Keras-Applications==1.0.8
Keras-Preprocessing==1.1.2
kiwisolver==1.3.1
labml==0.4.150
livereload==2.6.3
Mako==1.1.4
Markdown==3.3.4
MarkupSafe==2.0.1
matplotlib==3.4.2
matplotlib-inline==0.1.2
mbstrdecoder==1.0.1
mccabe==0.6.1
mistune==0.8.4
mlinsights==0.3.614
moviepy==1.0.3
mpi4py==3.1.3
mujoco-py==2.1.2.14
mypy-extensions==0.4.3
nbclient==0.5.3
nbconvert==6.1.0
nbformat==5.1.3
nes-py==8.1.8
nest-asyncio==1.5.1
networkx==2.6.2
ninja==1.10.2
notebook==6.4.0
numpy==1.21.2
oauthlib==3.1.1
opencv-python==4.5.3.56
-e git+https://github.com/illidanlab/opolo-code.git@89a7a0e8a06e7c8320acbdfef2069d6aadcb5863#egg=opolo_baselines&subdirectory=opolo-baselines
opt-einsum==3.3.0
optuna==2.8.0
packaging==21.0
pamela==1.0.0
pandas==1.3.1
pandas-streaming==0.3.218
pandocfilters==1.4.3
parso==0.8.2
pathspec==0.9.0
pathtools==0.1.2
pathvalidate==2.4.1
pbr==5.6.0
pexpect==4.8.0
pickleshare==0.7.5
Pillow==8.2.0
plotly==5.6.0
pluggy==0.13.1
prettytable==2.1.0
proglog==0.1.9
prometheus-client==0.11.0
promise==2.3
prompt-toolkit==3.0.19
protobuf==3.17.3
psutil==5.8.0
ptyprocess==0.7.0
py==1.10.0
pyaml==20.4.0
pyasn1==0.4.8
pyasn1-modules==0.2.8
pybullet==3.1.7
pycodestyle==2.7.0
pycparser==2.20
pyee==8.2.2
pyenchant==3.2.1
pyflakes==2.3.1
pyglet==1.5.11
Pygments==2.9.0
pyOpenSSL==20.0.1
pyparsing==2.4.7
pyperclip==1.8.2
pyppeteer==0.2.6
pyrsistent==0.18.0
pytablewriter==0.62.0
pytest==6.2.4
pytest-cov==2.12.1
pytest-env==0.6.2
pytest-forked==1.3.0
pytest-xdist==2.3.0
python-dateutil==2.8.2
python-editor==1.0.4
python-json-logger==2.0.2
pytorch-ranger==0.1.1
pytype==2021.7.27
pytz==2021.1
PyVirtualDisplay==2.2
PyWavelets==1.1.1
PyYAML==5.4.1
pyzmq==22.1.0
regex==2021.7.6
requests==2.26.0
requests-oauthlib==1.3.0
rsa==4.7.2
ruamel.yaml==0.17.16
ruamel.yaml.clib==0.2.6
sb3-contrib==1.1.0
scikit-image==0.18.2
scikit-learn==0.24.2
scikit-optimize==0.8.1
scipy==1.7.1
seaborn==0.11.1
Send2Trash==1.7.1
sentry-sdk==1.3.1
shortuuid==1.0.1
six==1.16.0
smmap==4.0.0
snowballstemmer==2.1.0
Sphinx==4.1.2
sphinx-autobuild==2021.3.14
sphinx-autodoc-typehints==1.12.0
sphinx-rtd-theme==0.5.2
sphinxcontrib-applehelp==1.0.2
sphinxcontrib-devhelp==1.0.2
sphinxcontrib-htmlhelp==2.0.0
sphinxcontrib-jsmath==1.0.1
sphinxcontrib-qthelp==1.0.3
sphinxcontrib-serializinghtml==1.1.5
sphinxcontrib-spelling==7.2.1
SQLAlchemy==1.4.22
stable-baselines3==1.1.0
stevedore==3.3.0
subprocess32==3.5.4
tabledata==1.2.0
tabulate==0.8.9
tcolorpy==0.1.1
tenacity==8.0.1
tensorboard==1.15.0
tensorboard-data-server==0.6.1
tensorboard-plugin-wit==1.8.0
tensorflow-estimator==1.15.1
tensorflow-gpu==1.15.0
tensorflow-probability==0.8.0
termcolor==1.1.0
terminado==0.10.1
testpath==0.5.0
threadpoolctl==2.2.0
tifffile==2021.8.8
toml==0.10.2
tomli==1.2.0
torch==1.10.0.dev20210801+cu111
torch-lr-finder==0.2.1
torch-optimizer==0.1.0
torchaudio==0.10.0.dev20210801
torchvision==0.11.0.dev20210801+cu111
tornado==6.1
tqdm==4.62.0
traitlets==5.0.5
typed-ast==1.4.3
typepy==1.2.0
typing-extensions==3.7.4.3
urllib3==1.26.6
vit-pytorch==0.20.1
wandb==0.12.1
wcwidth==0.2.5
webencodings==0.5.1
websockets==9.1
Werkzeug==2.0.1
widgetsnbextension==3.5.1
wrapt==1.12.1
zipp==3.5.0
